# Supplementary material
Source: Elsevier journal article supplement (https://www.sciencedirect.com/science/article/pii/S0213911117300870)
Supplement: mmc1 [file S0213911117300870:mmc1.doc]

| **Apéndice**  **Tabla I**  Datos sociodemográficos, de contratación y de remuneración del personal médico entrevistado en consultorios adyacentes a farmacias privadas en Ciudad de México | | | | | | |
| --- | --- | --- | --- | --- | --- | --- |
| **Clave de entrevista** | **Edad**  **(años)** | **Años de práctica medica** | **Tiempo**  **laborando en CAF** | **Universidad** | **Tipo, temporalidad de contrato y prestaciones** | **Sistema de remuneración** |
| *Mujeres:* | | | | | | |
| 1. M2 | 58 | 35 | 4 años | Pública | No contrato, no prestaciones | Pago consulta |
| 2. M3 | 38 | 10 | 2 meses | Pública | Escrito, indefinido, no prestaciones | Salario base, incentivo por consultas y bono por puntualidad |
| 3. M4 | 41 | 7 | 6 meses | Pública | Escrito, indefinido, no prestaciones | Salario base |
| 4. M6 | 38 | 13 | 2 años | Pública | Escrito/comodato, trimestral, no prestaciones | Pago consulta |
| 5. M8 | 67 | 41 | 6 meses | Pública | Escrito, indefinido con prestaciones | Salario base, incentivo por consultas |
| 6. M10 | 29 | 3 | 1 año | Pública | Escrito/comodato, indefinido, no prestaciones | Pago consulta |
| 7. M11 | 44 | 3 | 3 años | Pública | Escrito, semestral, no prestaciones | Salario base |
| 8. M12 | 29 | 4 | 3 años | Pública | Escrito/comodato, anual, no prestaciones | Salario base |
| 9. M14 | 44 | 20 | 4 meses | Pública | Escrito/comodato, indefinido, no prestaciones | Pago consulta |
| 10. M15 | 37 | 10 | 9 meses | Pública | Escrito/comodato, anual, no prestaciones | Pago consulta |
| 11. M17 | 28 | 3 | ND | Pública | Escrito, indefinido con prestaciones | Salario base |
| 12. M18 | 31 | 3 | 1 mes | Pública | Escrito, indefinido con prestaciones | Salario base, incentivo por consultas |
| 13. M20 | 50 | 10 | 2 años | Pública | Verbal, no prestaciones | Salario base, incentivo por consultas, procedimientos y medicamentos |
| 14. M22 | 38 | 14 | 5 meses | Pública | Verbal, no prestaciones | Salario base, incentivo por consultas |
| 15. M24 | 43 | 2 | 4 meses | Pública | Verbal, no prestaciones | Salario base, incentivo por consultas y procedimientos |
| 16. M25 | 33 | 4 | 3 meses | Pública | Escrito, indefinido, no prestaciones | Salario base, incentivo por consultas, procedimientos y medicamentos |
| 17. M27 | 31 | 7 | 6 meses | Pública | Escrito, semestral, no prestaciones | Salario base, incentivo por consultas |
| 18. M28 | 42 | 19 | 8 meses | Pública | Escrito/comodato indefinido, no prestaciones | Pago consultas |
| 19. M29 | 39 | 11 | 8 años | Pública | Escrito/comodato, indefinido, no prestaciones | Pago consultas |
| 20. M32 | 26 | 7 meses | 4 meses | Pública | Escrito/comodato, no prestaciones | Pago consultas |
| *Hombres:* | | | | | | |
| 21. M1 | 37 | 12 | 10 años | Pública | Escrito, bimestral con prestaciones | Salario base, incentivo por consultas y medicamentos |
| 22. M5 | 29 | 9 | 7 meses | Pública | Escrito/comodato, indefinido, no prestaciones | Pago consulta |
| 23. M7 | 26 | 1 | 3 meses | Pública | Escrito/comodato, quinquenal, no prestaciones | Salario base, incentivo por consultas, procedimientos y medicamentos |
| 24. M9 | 35 | 10 | 5 meses | Privada | Escrito/comodato, indefinido, no prestaciones | Salario base, incentivo por consultas y procedimientos |
| 25. M13 | 33 | 3 | 1 mes | Pública | Escrito, indefinido, no prestaciones | Salario base, incentivo por consultas y medicamentos |
| 26. M16 | 52 | 29 | 1 año | Pública | Verbal, no prestaciones | Salario base, incentivo por consultas y procedimientos |
| 27. M19 | 54 | 29 | 2 meses | Pública | Escrito, anual | Salario base |
| 28. M21 | 57 | 29 | 1 año | Pública | Escrito/comodato, indefinido, no prestaciones | Pago consultas |
| 29. M23 | 67 | 40 | 3 semanas | Pública | Verbal no prestaciones | Pago consulta, incentivo por consultas, procedimientos y medicamentos |
| 30. M26 | 28 | 4 | 2 meses | Pública | Escrito, semestral, no prestaciones | Salario base, incentivo por consultas |
| 31. M30 | 26 | 1 | 1 año | Pública | Escrito/comodato, no prestaciones | Pago consultas |
| 32. M31 | 24 | 2 mesesa | 2 meses | Pública | Verbal, no prestaciones | Salario base |
|  | | | | | | |

CAF: consultorios adyacentes a farmacias privadas; ND: no disponible.

**a** Título en trámite.
